# Supplementary material for: Synthesis, Properties, and Enzymatic Hydrolysis of Poly(lactic acid)-co-Poly(propylene adipate) Block Copolymers Prepared by Reactive Extrusion
Source: MDPI journal article supplement (doi:10.3390/polym13234121), 2021-11-26
Supplement: s1 [file s1]

## Supplementary Materials

# Synthesis, Properties, and Enzymatic Hydrolysis of Poly(lactic acid)-co-poly(propylene adipate) Block Copolymers Prepared by Reactive Extrusion

Zoi Terzopoulou <sup>1,\*</sup>, Alexandra Zamboulis <sup>1</sup>, Dimitrios N. Bikiaris <sup>1</sup>, Miguel Angel Valera <sup>2</sup> and Ana Mangas <sup>2</sup>

<sup>1</sup> Laboratory of Chemistry and Technology of Polymers and Dyes, Department of Chemistry, Aristotle University of Thessaloniki, GR-541 24 Thessaloniki, Greece; azamboulis@gmail.com (A.Z.); dbic@chem.auth.gr (D.B.)

<sup>2</sup> AIMPLAS, Asociación de Investigación de Materiales Plásticos Y Conexas, Carrer de Gustave Eiffel, 4, 46980 Paterna, Valencia, Spain ; mavalera@aimplas.es (M.A.V.); amangas@aimplas.es (A.M.)

\* Correspondence: terzozoi@chem.auth.gr

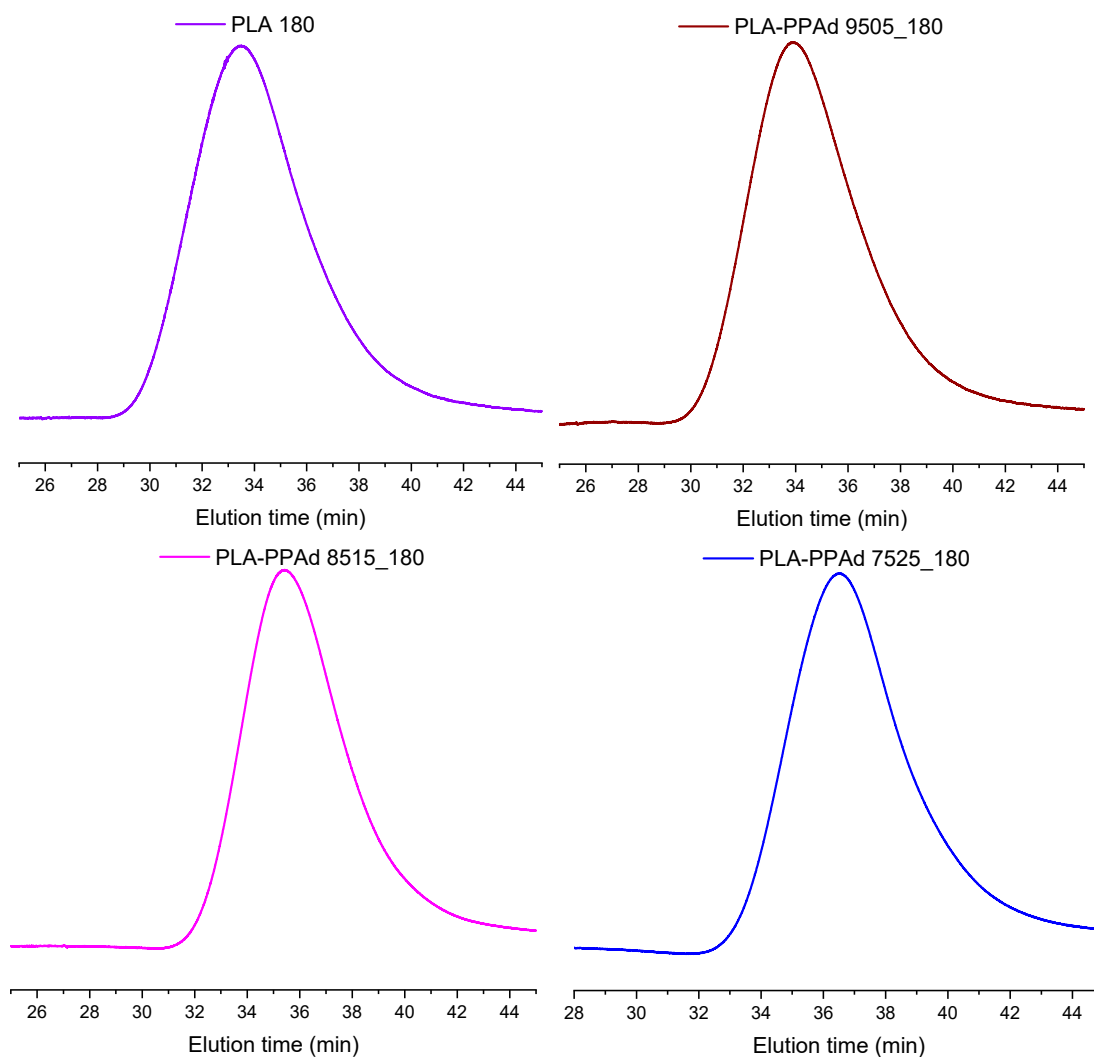

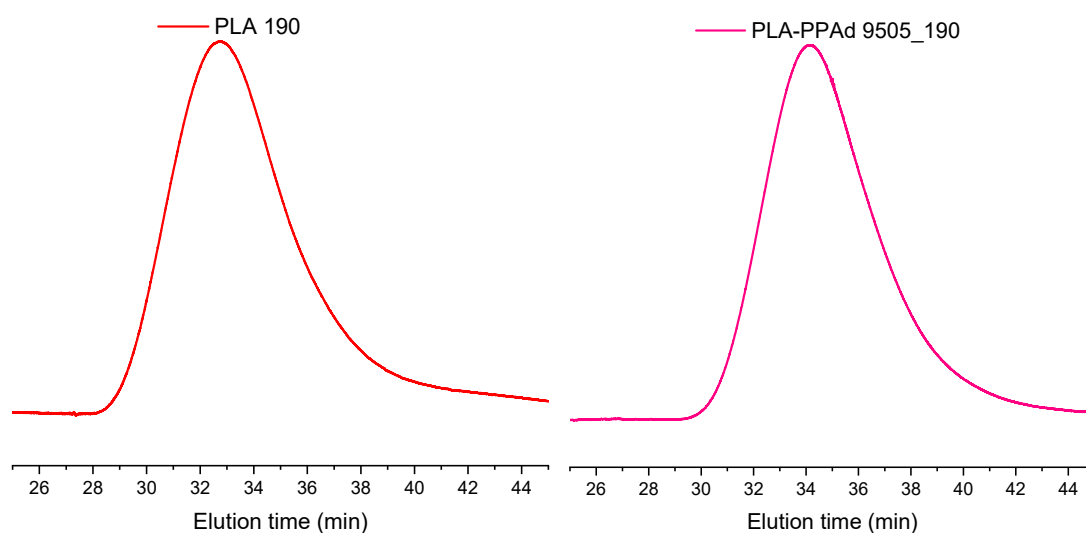

**Figure S1.** GPC chromatographs.

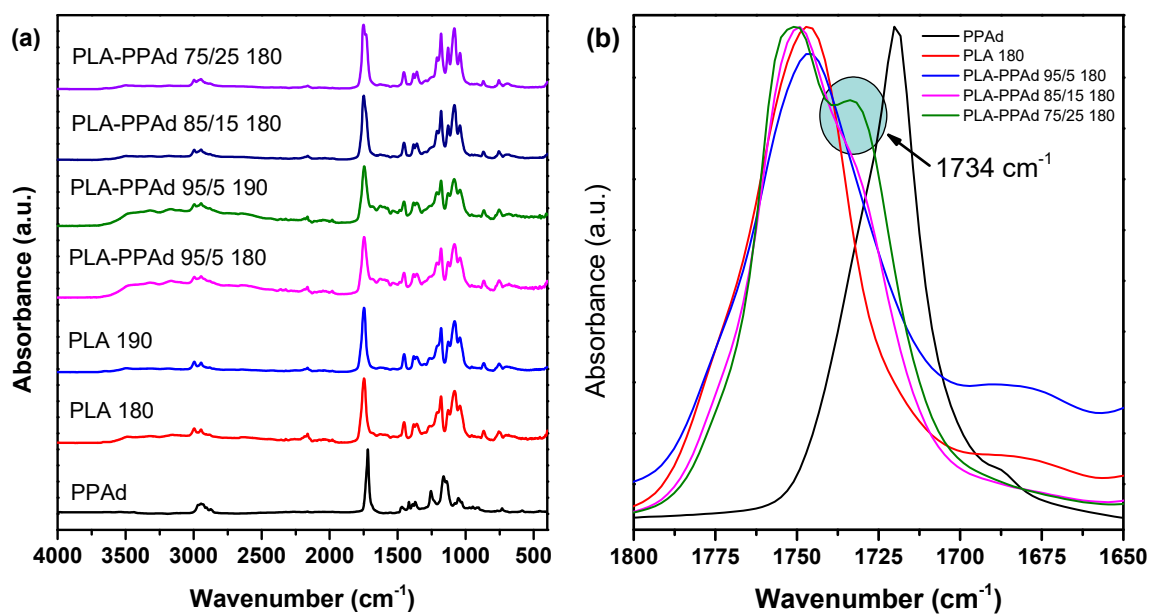

**Figure S2.** (a) ATR spectra of PPAAd, PLA and their copolymers, (b) zoom in the 1800-1650  $\text{cm}^{-1}$  region of PPAAd and the materials prepared at 180  $^{\circ}\text{C}$ .

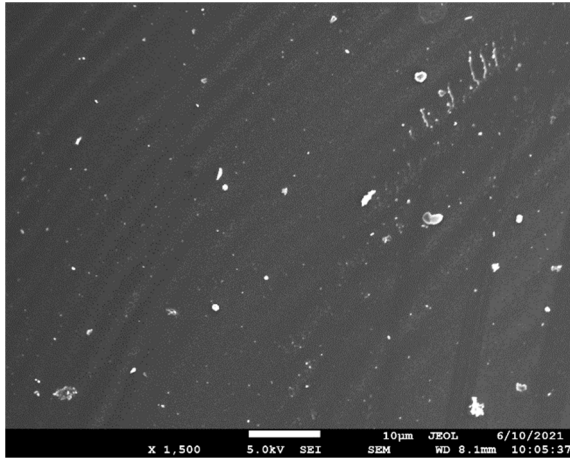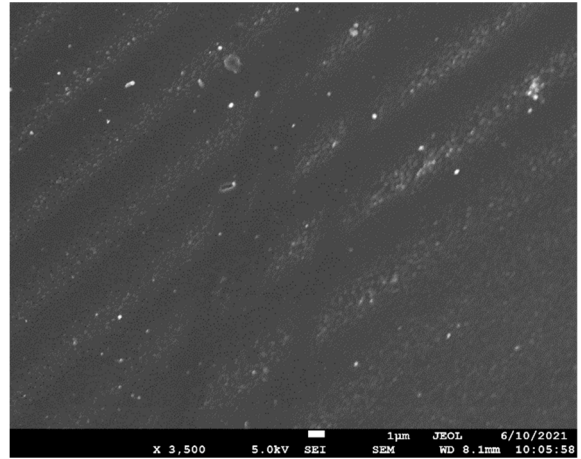

(a) PLA 180

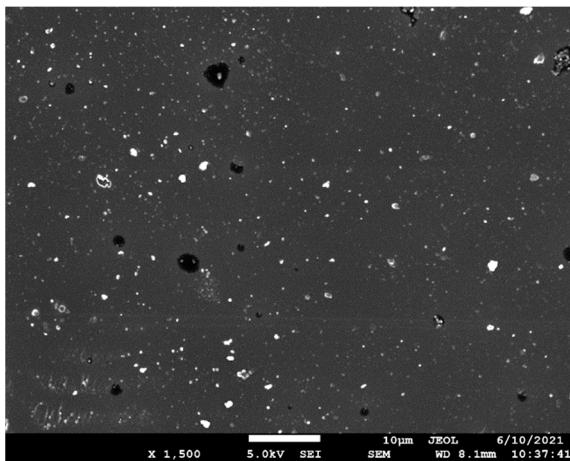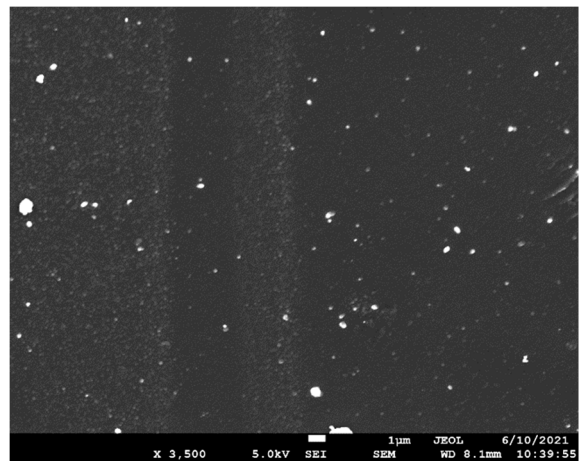

(b) PLA-PPAd 95/5 180

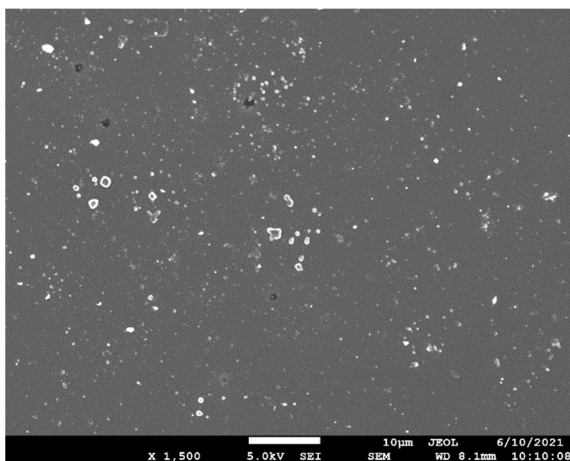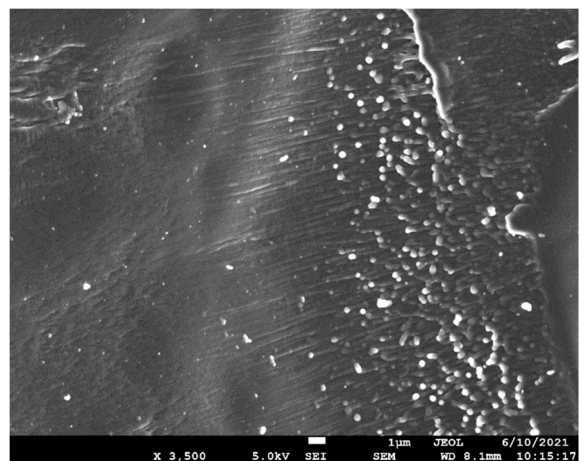

(c) PLA-PPAd 85/15 180

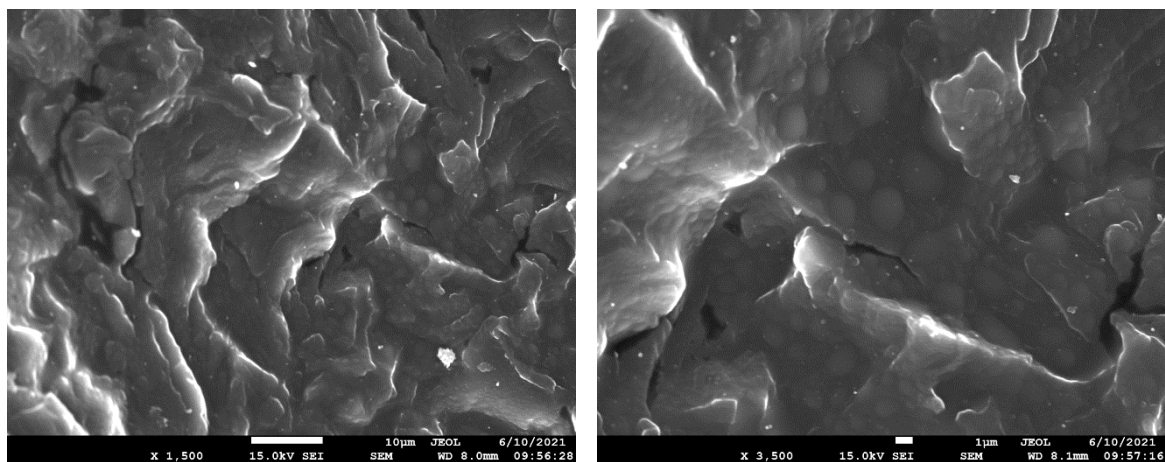

(d) PLA-PPAd 75/25 180

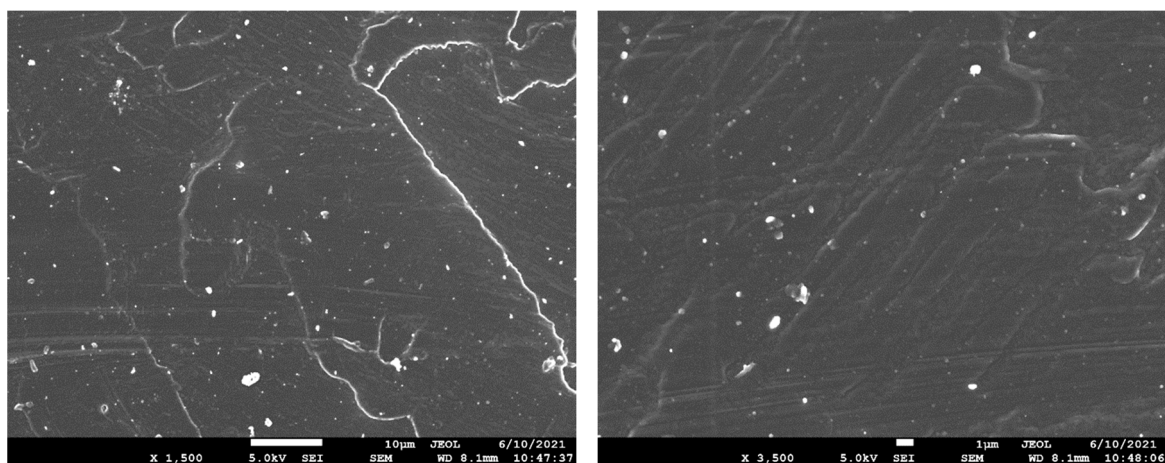

(e) PLA 190

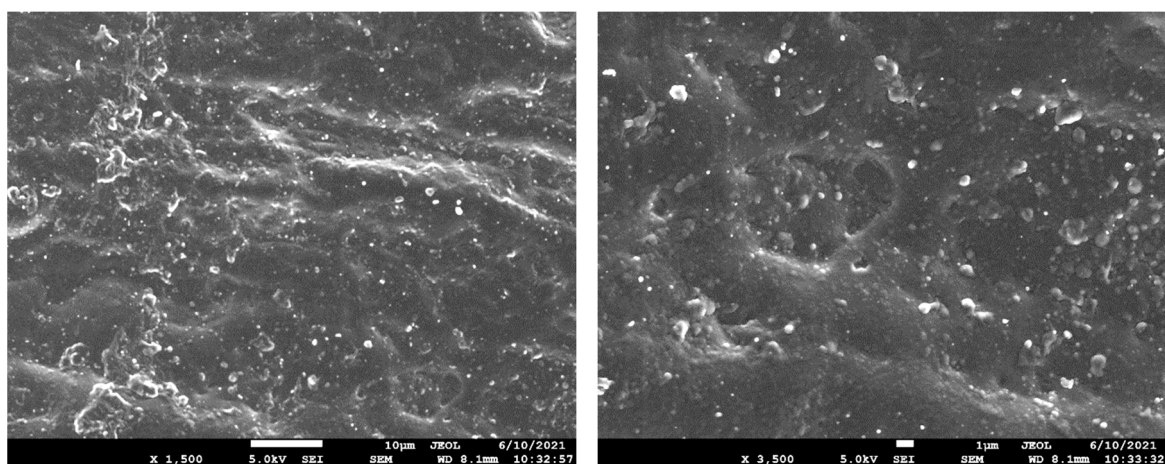

(f) PLA-PPAd 95/5 190

**Figure S3.** SEM micrographs of cryofractured surfaces in different magnifications (x1500 and x3500).
